# Supplementary material for: Genetic and epigenetic aberrations occurring in colorectal tumors associated with serrated pathway
Source: PubMed Central journal article supplement — Int J Cancer. 2015 Nov 12;138(7):1634–44. doi: 10.1002/ijc.29903 (PMC4737347; doi:10.1002/ijc.29903), 2015-11-12

Supplementary Table S1. List of genes for a targeted exon sequencing analysis.

| Target genes | # of regions | Coverage | High coverage (>= 90%) | Low coverage (< 90%) |
|--------------|--------------|----------|------------------------|----------------------|
| ACVR1B       | 10           | 100%     | 10                     | 0                    |
| ACVR2A       | 11           | 100%     | 11                     | 0                    |
| APC          | 19           | 100%     | 19                     | 0                    |
| APOB         | 30           | 100%     | 30                     | 0                    |
| AR           | 11           | 100%     | 11                     | 0                    |
| ARID1A       | 20           | 100%     | 20                     | 0                    |
| ARID2        | 24           | 100%     | 24                     | 0                    |
| ASXL1        | 17           | 100%     | 17                     | 0                    |
| ATM          | 62           | 100%     | 61                     | 1                    |
| ATRX         | 37           | 100%     | 37                     | 0                    |
| AXIN2        | 11           | 100%     | 11                     | 0                    |
| BCOR         | 16           | 100%     | 16                     | 0                    |
| BMP2         | 2            | 100%     | 2                      | 0                    |
| BMP4         | 2            | 100%     | 2                      | 0                    |
| BMPR1A       | 11           | 100%     | 11                     | 0                    |
| BMPR1B       | 11           | 100%     | 11                     | 0                    |
| BMPR2        | 13           | 99%      | 13                     | 0                    |
| BRAF         | 21           | 100%     | 21                     | 0                    |
| BRCA1        | 24           | 100%     | 24                     | 0                    |
| BRCA2        | 26           | 100%     | 26                     | 0                    |
| CARD11       | 24           | 100%     | 24                     | 0                    |
| CASP8        | 13           | 100%     | 13                     | 0                    |
| CBL          | 16           | 100%     | 16                     | 0                    |
| CDC27        | 19           | 99%      | 18                     | 1                    |
| CDC73        | 17           | 100%     | 17                     | 0                    |
| CDH1         | 17           | 100%     | 17                     | 0                    |
| CIC          | 20           | 100%     | 20                     | 0                    |
| COL6A3       | 43           | 100%     | 43                     | 0                    |
| CREBBP       | 31           | 100%     | 30                     | 1                    |
| CSMD3        | 72           | 100%     | 72                     | 0                    |
| CTNNB1       | 14           | 100%     | 14                     | 0                    |
| CYLD         | 18           | 100%     | 18                     | 0                    |
| DNAH11       | 84           | 99%      | 82                     | 2                    |
| DNAH5        | 79           | 100%     | 79                     | 0                    |
| DNMT1        | 42           | 100%     | 42                     | 0                    |
| EDNRB        | 9            | 100%     | 9                      | 0                    |
| EGFR         | 32           | 100%     | 32                     | 0                    |
| EP300        | 31           | 100%     | 31                     | 0                    |
| ERBB2        | 28           | 100%     | 28                     | 0                    |
| ERBB3        | 29           | 100%     | 29                     | 0                    |
| ERBB4        | 29           | 100%     | 29                     | 0                    |
| EZH2         | 21           | 98%      | 20                     | 1                    |
| FAM123B      | 2            | 100%     | 2                      | 0                    |
| FAT4         | 18           | 100%     | 18                     | 0                    |
| FBXW7        | 14           | 100%     | 14                     | 0                    |
| FGFR2        | 23           | 100%     | 23                     | 0                    |
| FLG          | 2            | 98%      | 2                      | 0                    |
| FZD10        | 1            | 100%     | 1                      | 0                    |
| FZD3         | 6            | 100%     | 6                      | 0                    |
| GNAS         | 17           | 99%      | 16                     | 1                    |
| GPC6         | 9            | 100%     | 9                      | 0                    |
| GPR98        | 94           | 100%     | 94                     | 0                    |
| HMCN1        | 107          | 100%     | 107                    | 0                    |

|          |     |      |     |    |
|----------|-----|------|-----|----|
| HNF1A    | 12  | 100% | 12  | 0  |
| IGF2     | 4   | 100% | 4   | 0  |
| IRS2     | 2   | 100% | 2   | 0  |
| JAK2     | 23  | 100% | 23  | 0  |
| JAK3     | 23  | 100% | 23  | 0  |
| KDM5C    | 29  | 100% | 29  | 0  |
| KDM6A    | 31  | 100% | 31  | 0  |
| KIAA1804 | 10  | 100% | 10  | 0  |
| KIT      | 22  | 100% | 22  | 0  |
| KRAS     | 5   | 100% | 5   | 0  |
| LRP1B    | 93  | 100% | 92  | 1  |
| LRP2     | 79  | 100% | 79  | 0  |
| MAP7     | 21  | 100% | 21  | 0  |
| MEN1     | 9   | 100% | 9   | 0  |
| MET      | 21  | 100% | 21  | 0  |
| MIER3    | 15  | 100% | 15  | 0  |
| MLH1     | 20  | 100% | 20  | 0  |
| MLL2     | 54  | 99%  | 54  | 0  |
| MLL3     | 62  | 98%  | 58  | 4  |
| MSH2     | 18  | 100% | 18  | 0  |
| MSH3     | 24  | 100% | 24  | 0  |
| MSH6     | 10  | 100% | 10  | 0  |
| MUC16    | 84  | 100% | 83  | 1  |
| MUC2     | 50  | 93%  | 49  | 1  |
| MUC4     | 26  | 54%  | 25  | 1  |
| MYO1B    | 31  | 100% | 31  | 0  |
| NCOA3    | 21  | 100% | 21  | 0  |
| NCOR1    | 47  | 99%  | 46  | 1  |
| NEB      | 183 | 92%  | 168 | 15 |
| NEFH     | 4   | 97%  | 4   | 0  |
| NF1      | 60  | 100% | 59  | 1  |
| NF2      | 17  | 100% | 17  | 0  |
| NOTCH1   | 34  | 100% | 34  | 0  |
| NOTCH2   | 38  | 99%  | 37  | 1  |
| NRAS     | 4   | 100% | 4   | 0  |
| ODZ1     | 32  | 100% | 32  | 0  |
| PDGFRA   | 24  | 100% | 24  | 0  |
| PIK3CA   | 20  | 99%  | 18  | 2  |
| PIK3R1   | 19  | 100% | 19  | 0  |
| PKHD1    | 69  | 100% | 69  | 0  |
| PTCH1    | 27  | 100% | 27  | 0  |
| PTEN     | 9   | 100% | 9   | 0  |
| PTPN11   | 16  | 97%  | 15  | 1  |
| PTPN12   | 20  | 100% | 20  | 0  |
| RB1      | 27  | 100% | 27  | 0  |
| RELN     | 66  | 100% | 66  | 0  |
| RET      | 20  | 99%  | 19  | 1  |
| RNF43    | 9   | 100% | 9   | 0  |
| ROS1     | 45  | 100% | 45  | 0  |
| RUNX1    | 12  | 97%  | 11  | 1  |
| RYR1     | 106 | 100% | 106 | 0  |
| RYR2     | 111 | 100% | 110 | 1  |
| RYR3     | 107 | 100% | 106 | 1  |
| SETD2    | 27  | 100% | 27  | 0  |
| SMAD1    | 6   | 100% | 6   | 0  |
| SMAD2    | 10  | 100% | 10  | 0  |
| SMAD3    | 10  | 100% | 10  | 0  |

|         |     |      |     |    |
|---------|-----|------|-----|----|
| SMAD4   | 13  | 100% | 13  | 0  |
| SMARCA4 | 39  | 100% | 39  | 0  |
| SOX9    | 3   | 100% | 3   | 0  |
| STK11   | 9   | 100% | 9   | 0  |
| SYNE1   | 151 | 100% | 151 | 0  |
| TCERG1  | 22  | 100% | 22  | 0  |
| TCF7L2  | 18  | 100% | 18  | 0  |
| TGFBR1  | 10  | 100% | 10  | 0  |
| TGFBR2  | 9   | 100% | 9   | 0  |
| TP53    | 14  | 98%  | 13  | 1  |
| TSHR    | 11  | 100% | 11  | 0  |
| TTN     | 364 | 99%  | 345 | 19 |
| USH2A   | 72  | 100% | 72  | 0  |
| VHL     | 3   | 99%  | 3   | 0  |
| WT1     | 11  | 100% | 11  | 0  |
| ZFHX4   | 13  | 99%  | 12  | 1  |

The list of 126 candidate cancer driver genes analyzed in target exon sequencing and coverage information are shown.

Supplementary Table S2. Primers for Sanger sequencing.

| locus                 | primer           | sequence                        | PCR product | anneal |
|-----------------------|------------------|---------------------------------|-------------|--------|
| ACVR2A Chr2 148683685 | acvr2a-1-Forward | CTTACTTTTCAGGACCTGTAGATG        | 589bp       | 55°C   |
|                       | acvr2a-1-Reverse | TATAGTTTTAAAGCACTATTAAGACTTGAAA |             |        |
| ACVR2A Chr2 148657040 | acvr2a-2-Forward | AATCTTGAAGTTGAATATAAATGACTAA    | 577bp       | 55°C   |
|                       | acvr2a-2-Reverse | TACAGGACAATAACTTACTTGAGTTGGA    |             |        |
| MSH3 Chr5 79970914    | msh3-Forward     | GGAAGTAAGATACTGGTTATCTGTCTTTA   | 1,042bp     | 55°C   |
|                       | msh3-Reverse     | TGATTAGATTGTGAGGCCAGATTTTC      |             |        |
|                       | msh3-Sequence    | TAATCAAGCTGGATGATGCTGTAAA       |             |        |
| MSH6 Chr7 48030638    | msh6-Forward     | ACGTGTATTAGGCACTGCTAATTTCTG     | 817bp       | 55°C   |
|                       | msh6-Reverse     | CCCCTTAACATTAAGCATCGATG         |             |        |
|                       | msh6-Sequence    | AAACGATGAAGCCTCACTTTTAC         |             |        |
| BMPR2 Chr2 203420129  | bmpr2-Forward    | AGATTATTCTTCCTCCTCATAATTGAA     | 505bp       | 55°C   |
|                       | bmpr2-Reverse    | TTTTATGAGTGGGTAAAGCAAGCTA       |             |        |

Supplementary Table S3. List of mutation detected by targeted exon sequencing.

|                         | ACVR1B                        | ACVR2A                         | APC                              | APOB                            | AR                          | ARID1A                            | ARID2                        | ASXL1                           | ATM                              | ATRX                             |
|-------------------------|-------------------------------|--------------------------------|----------------------------------|---------------------------------|-----------------------------|-----------------------------------|------------------------------|---------------------------------|----------------------------------|----------------------------------|
| High-methylation CRC 1  |                               | c.1303_1303delA<br>p.K437Rfs*5 |                                  | c.7911_7912insT<br>p.N2738fs    |                             |                                   | c.102_103insA<br>p.I37Nfs*29 |                                 | c.8755G>A,<br>p.G2919S           |                                  |
| High-methylation CRC 2  | c.802A>G<br>p.M288V           | c.1303_1303delA<br>p.K437Rfs*5 | c.4385_4386delAG<br>p.S1465Wfs*3 |                                 |                             | c.6415_6415delC<br>p.F2141Sfs*59  | c.4391G>A<br>p.R1464H        |                                 |                                  |                                  |
| High-methylation CRC 3  |                               | c.278_278delA<br>p.D96Tfs*54   | c.1843_1843delT<br>p.L616Wfs*14  |                                 |                             |                                   |                              |                                 |                                  |                                  |
| High-methylation CRC 4  |                               | c.278_278delA<br>p.D96Tfs*54   |                                  | c.9632_9632delA<br>p.N3211Tfs*6 | c.288_289insC<br>p.Q98Pfs*5 | c.4627G>T<br>p.G1543C             |                              |                                 |                                  |                                  |
| High-methylation CRC 5  |                               | c.1303_1303delA<br>p.K437Rfs*5 |                                  |                                 |                             | c.1631A>H<br>p.544RG.             |                              |                                 |                                  | c.3904_3904delA<br>p.R1302Efs*44 |
| High-methylation CRC 6  |                               | c.1303_1303delA<br>p.K437Rfs*5 | c.2693A>G<br>p.H880R             | c.6044C>T<br>p.A2015V           |                             | c.3668G>A<br>p.R1223H             |                              |                                 |                                  |                                  |
| High-methylation CRC 7  | c.623_623delT<br>p.L209Yfs*25 | c.1303_1303delA<br>p.K437Rfs*5 | c.4660_4661insA<br>p.T1556Nfs*3  |                                 | c.91C>T<br>p.R31C           | c.3972_3972delC<br>p.P1326Rfs*155 | c.2806G>T<br>p.G936C         |                                 |                                  |                                  |
| High-methylation CRC 8  |                               | c.278_278delA<br>p.D96Tfs*54   |                                  |                                 |                             | c.4549_4550insC<br>p.Q1519Pfs*13  |                              | c.1927_1927delG<br>p.G645Vfs*58 | c.8278_8279delCT<br>p.Q2762Afs*6 |                                  |
| High-methylation CRC 9  |                               | c.1303_1303delA<br>p.K437Rfs*5 |                                  | c.3163C>T<br>p.R1055W           |                             | c.967_967delG<br>p.G324Afs*39     |                              |                                 |                                  |                                  |
| High-methylation CRC 10 |                               | c.1303_1303delA<br>p.K437Rfs*5 |                                  | c.237G>T<br>p.K79N              |                             | c.5542_5542delG<br>p.D1850Tfs*33  |                              |                                 |                                  |                                  |
| High-methylation CRC 11 | c.1294C>T<br>p.R432C          | c.1303_1303delA<br>p.K437Rfs*5 |                                  |                                 |                             | c.1645_1645delC<br>p.Y551Tfs*68   |                              |                                 | c.4124C>T<br>p.A1375V            |                                  |
| SSA/P 1                 |                               |                                |                                  | c.1529T>G<br>p.I510S            |                             |                                   |                              |                                 |                                  |                                  |
| SSA/P 2                 |                               |                                |                                  |                                 |                             |                                   |                              |                                 |                                  | c.6660G>T<br>p.L2220F            |
| SSA/P 3                 |                               |                                |                                  |                                 |                             |                                   |                              |                                 |                                  |                                  |
| SSA/P 4                 |                               |                                |                                  |                                 |                             |                                   |                              |                                 |                                  |                                  |
| SSA/P 5                 |                               |                                |                                  |                                 |                             |                                   |                              |                                 |                                  |                                  |
| SSA/P 6                 |                               |                                |                                  |                                 |                             |                                   |                              |                                 |                                  |                                  |
| SSA/P 7                 |                               |                                |                                  |                                 |                             |                                   |                              |                                 |                                  |                                  |
| SSA/P 8                 |                               |                                |                                  |                                 |                             |                                   |                              |                                 |                                  |                                  |
| SSA/P 9                 |                               |                                |                                  |                                 |                             |                                   | c.5423C>G<br>p.S1808C        |                                 |                                  |                                  |
| SSA/P 10                |                               |                                | c.4660_4661insA<br>p.T1556Nfs*3  | c.5260_5260delA<br>p.T1754Gfs*4 |                             |                                   |                              |                                 |                                  |                                  |
| SSA/P 11                |                               |                                |                                  |                                 |                             |                                   |                              |                                 |                                  |                                  |
| SSA/P 12                |                               |                                |                                  |                                 |                             |                                   | c.853C>T<br>p.R285W          |                                 |                                  |                                  |
| SSA/P 13                |                               |                                |                                  |                                 |                             |                                   |                              |                                 |                                  |                                  |
| SSA/P 14                |                               |                                |                                  |                                 |                             |                                   |                              |                                 |                                  |                                  |
| SSA/P 15                |                               |                                |                                  |                                 |                             |                                   |                              |                                 |                                  |                                  |
| SSA/P 16                |                               |                                |                                  |                                 |                             |                                   |                              |                                 |                                  |                                  |
| SSA/P 17                |                               |                                |                                  |                                 |                             |                                   |                              |                                 | c.5867T>A<br>p.L1956H            |                                  |
| SSA/P 18                |                               |                                |                                  |                                 |                             |                                   |                              |                                 |                                  |                                  |
| SSA/P 19                |                               |                                |                                  |                                 |                             |                                   | c.4679C>T<br>p.A1560V        |                                 |                                  |                                  |
| SSA/P 20                |                               | c.1303_1303delA<br>p.K437Rfs*5 |                                  |                                 |                             |                                   |                              |                                 |                                  | c.3145_3145delA<br>p.I1049*      |
| SSA/P 21                |                               |                                |                                  |                                 |                             |                                   |                              |                                 |                                  |                                  |
| SSA/P 22                |                               |                                |                                  |                                 |                             |                                   |                              |                                 |                                  |                                  |
| SSA/P 23                |                               |                                | c.8017A>G<br>p.R2655G            |                                 |                             |                                   |                              |                                 |                                  |                                  |
| SSA/P 24                |                               |                                |                                  |                                 |                             |                                   |                              |                                 |                                  |                                  |
| SSA/P 25                |                               |                                |                                  |                                 |                             |                                   |                              |                                 |                                  |                                  |
| TSA 1                   |                               |                                |                                  | c.3023C>G<br>p.T1008R           |                             |                                   |                              |                                 |                                  |                                  |
| TSA 2                   |                               |                                | c.2034_2035insTA<br>p.N679*      |                                 |                             |                                   |                              |                                 |                                  |                                  |
| TSA 3                   |                               |                                |                                  |                                 |                             |                                   |                              |                                 |                                  |                                  |
| TSA 4                   |                               |                                | c.1379A>G<br>p.E442G             |                                 |                             |                                   |                              |                                 |                                  |                                  |
| TSA 5                   |                               |                                |                                  |                                 |                             |                                   |                              |                                 |                                  |                                  |
| TSA 6                   |                               |                                |                                  |                                 |                             |                                   |                              |                                 |                                  |                                  |
| TSA 7                   |                               |                                |                                  |                                 |                             |                                   |                              |                                 |                                  |                                  |
| TSA 8                   |                               | c.1288G>T<br>p.E430*           |                                  |                                 |                             |                                   |                              |                                 |                                  |                                  |
| TSA 9                   |                               |                                |                                  |                                 |                             |                                   |                              |                                 |                                  |                                  |
| TSA 10                  |                               |                                |                                  |                                 |                             | c.4189C>T<br>p.Q1397*             |                              |                                 |                                  |                                  |



























1 **Supplementary figure legends**

2

3 **Supplementary Figure S1.**

4 Heatmap of methylation levels of six Group-1 markers and 14 Group-2 markers (*top*)  
5 and clinicopathological factors (*bottom*). Methylation levels of CRC and LST samples  
6 had been previously analyzed<sup>1,2</sup>, and average methylation levels were shown in Figure 2,  
7 but those data were fully represented in this supplementary figure for comparison. High-  
8 methylation CRC, LST-G and LST-NG could be classified into high-, intermediate- and  
9 low-methylation epigenotypes, respectively: high-methylation epigenotype shows  
10 methylation of both Group-1 and Group-2 markers, and intermediate-methylation  
11 epigenotype shows methylation of Group-2 markers but not Group-1 markers. SSA/P  
12 exhibited generally high methylation levels of both Group-1 and Group-2 markers,  
13 similar to the results of high-methylation CRC, thus SSA/P was considered to be high-  
14 methylation epigenotype. TSA exhibited high methylation levels of Group-2 markers  
15 but low methylation levels of Group-1 markers similar to the results of LST-G, thus  
16 TSA was considered to be intermediate-methylation epigenotype. Compared with TSA,  
17 SSA/P was significantly correlated with a proximal colon location, frequent *BRAF*  
18 mutation, and the absence of *KRAS* mutation, which were the features of high-

1 methylation CRC.

2

3 **Supplementary Figure S2.**

4 Sequence coverage of targeted bases. The fraction of the targeted bases that were  
5 covered by unique reads at the sequence depth of 5×, 10×, 20× and 100× is shown. Two  
6 SSA/P samples (\*) that had a coverage of <60% at a 100× depth were excluded from the  
7 subsequent analysis.

8

9 **Supplementary Figure S3.**

10 Pattern of mutation spectra. The patterns were quite similar among high-methylation  
11 CRC, SSA/P, and TSA

12

13 **Supplementary Figure S4.**

14 Comparison of somatic mutations between high-methylation CRC, SSA/P and TSA.  
15 The frequency of somatic mutations was significantly higher in high-methylation CRC  
16 than in SSA/P or TSA, both in indels ( $21.0 \pm 4.5$  vs  $5.1 \pm 2.7$  for SSA/P,  $P < 0.0001$ , and  
17 vs  $4.5 \pm 2.3$  for TSA,  $P < 0.0001$ ), and in non-synonymous (missense and nonsense)  
18 mutations ( $282.3 \pm 27.5$  vs  $245.7 \pm 19.3$  for SSA/P,  $P < 0.0001$ , and vs  $232.7 \pm 17.4$  for  
19 TSA,  $P = 0.001$ ). However, the frequency of somatic mutations was not significantly  
20 different between *MLH1*-methylated and *MLH1*-unmethylated SSA/P ( $247.2 \pm 20.1$  vs

1 244.8 ± 18.6,  $P=0.75$  and 5.8 ± 2.1 vs 4.5 ± 2.2,  $P=0.12$ , for non-synonymous mutations  
2 and indels, respectively).

3

#### 4 **Supplementary Figure S5.**

5 Frequency of genetic alterations. The *black circle* represents genes with non-  
6 synonymous mutations. The *black rhombus* represents genes with indels. For MLH1  
7 expression, MLH1-loss(+), -loss(±) and -loss(-) were shown by *black*, *grey*, and *blank*,  
8 respectively. \* $P<0.05$ , for comparison of high-methylation cancer with SSA/P. † $P<0.05$ ,  
9 for comparison of SSA/P with TSA.

10

#### 11 **Supplementary Figure S6.**

12 Validation of *ACVR2A* mutation. (A) Review of Integrative Genomica Viewer. All the  
13 11 high-methylation CRC samples showed deletion of an adenine at chr2:148683685  
14 (*right*) or chr2:148657040 in *ACVR2A*, which was confirmed in all kinds of constructed  
15 reads with sufficient allele frequency. Among 25 SSA/P samples, 24 showed no  
16 mutation of *ACVR2A* (*left*). (B) Sanger sequencing using genomic DNA samples of  
17 cancer tissues and the corresponding normal tissues. The mutations occurred in the  
18 cancer sample (*right*), but not in the normal sample (*left*). The positions of mutations  
19 were marked with pale blue.

1

2 **Supplementary Figure S7.**

3 Sanger sequencing for *MSH3*, *MSH6* and *BMPR2*. The mutations occurred in the cancer  
4 sample (*right*), but not in the normal sample (*left*). The positions of mutations were  
5 marked with pale blue.

6

7 **Supplementary Figure S8.**

8 Immunostaining of MLH1. Two *MLH1*-methylated SSA/P samples were  
9 representatively shown. Most adenoma lesions retained MLH1 protein expression, but  
10 focal loss of MLH1 protein was detected in these two *MLH1*-methylated SSA/P samples.

11

1 **Supplementary Reference**

- 2 1. Sakai E, Ohata K, Chiba H, Matsushashi N, Doi N, Fukushima J, Endo H, Takahashi  
3 H, Tsuji S, Yagi K, Matsusaka K, Aburatani H, et al.: Methylation epigenotypes and  
4 genetic features in colorectal laterally spreading tumors. *Int J Cancer* 2014,  
5 135:1586-95.
- 6 2. Yagi K, Akagi K, Hayashi H, Nagae G, Tsuji S, Isagawa T, Midorikawa Y,  
7 Nishimura Y, Sakamoto H, Seto Y, Aburatani H, Kaneda A: Three DNA methylation  
8 epigenotypes in human colorectal cancer. *Clin Cancer Res* 2010, 16:21-33.

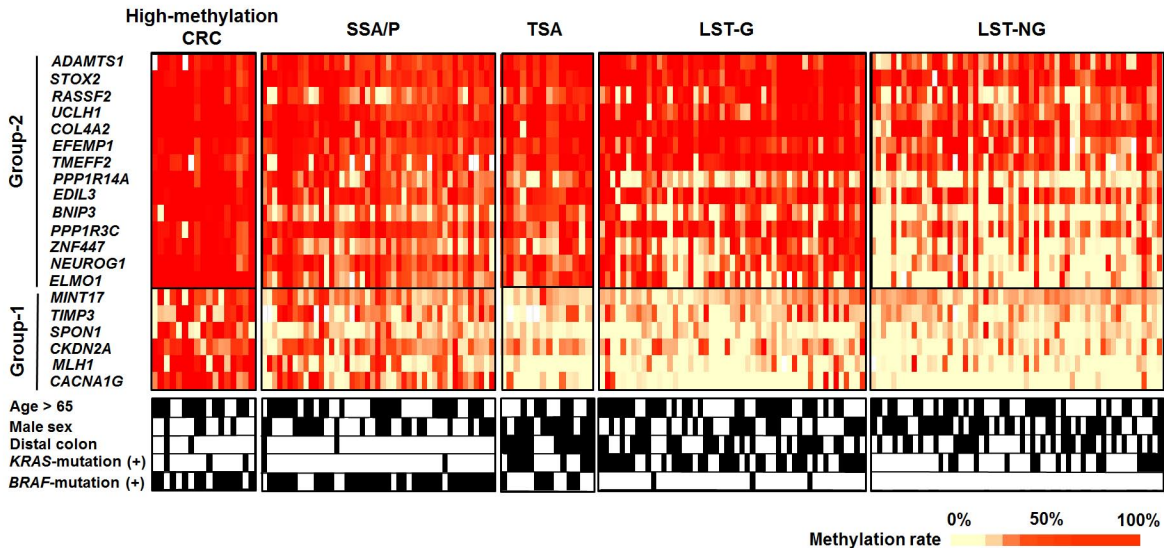

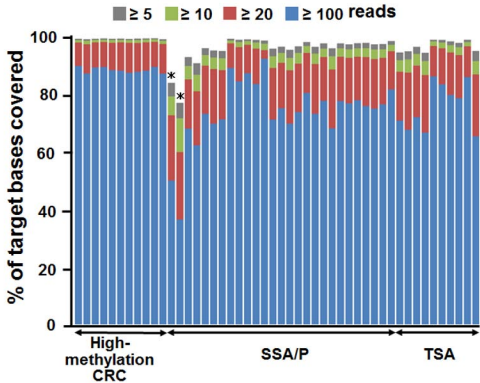

## Mutation spectra

## Supplementary Fig. S3

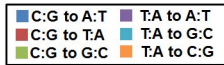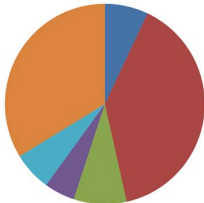

High-methylation  
CRC

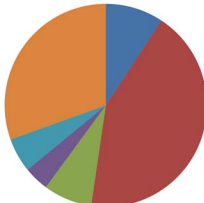

SSA/P

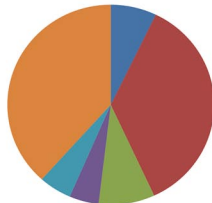

TSA



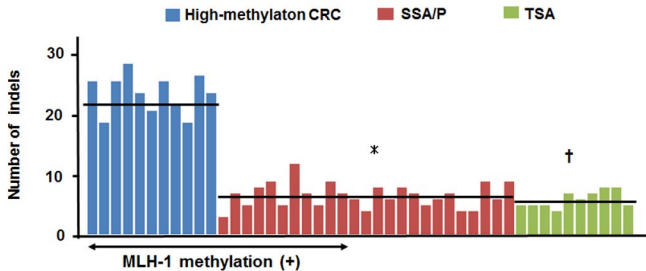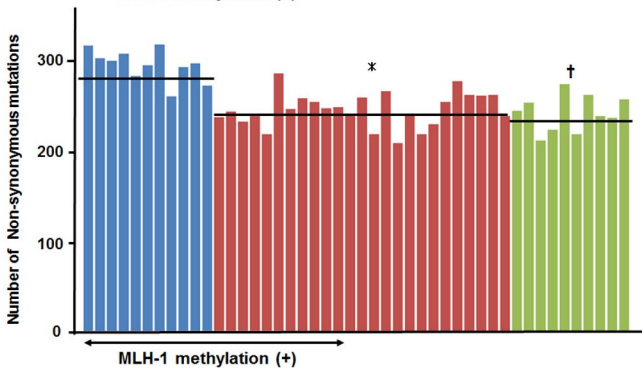

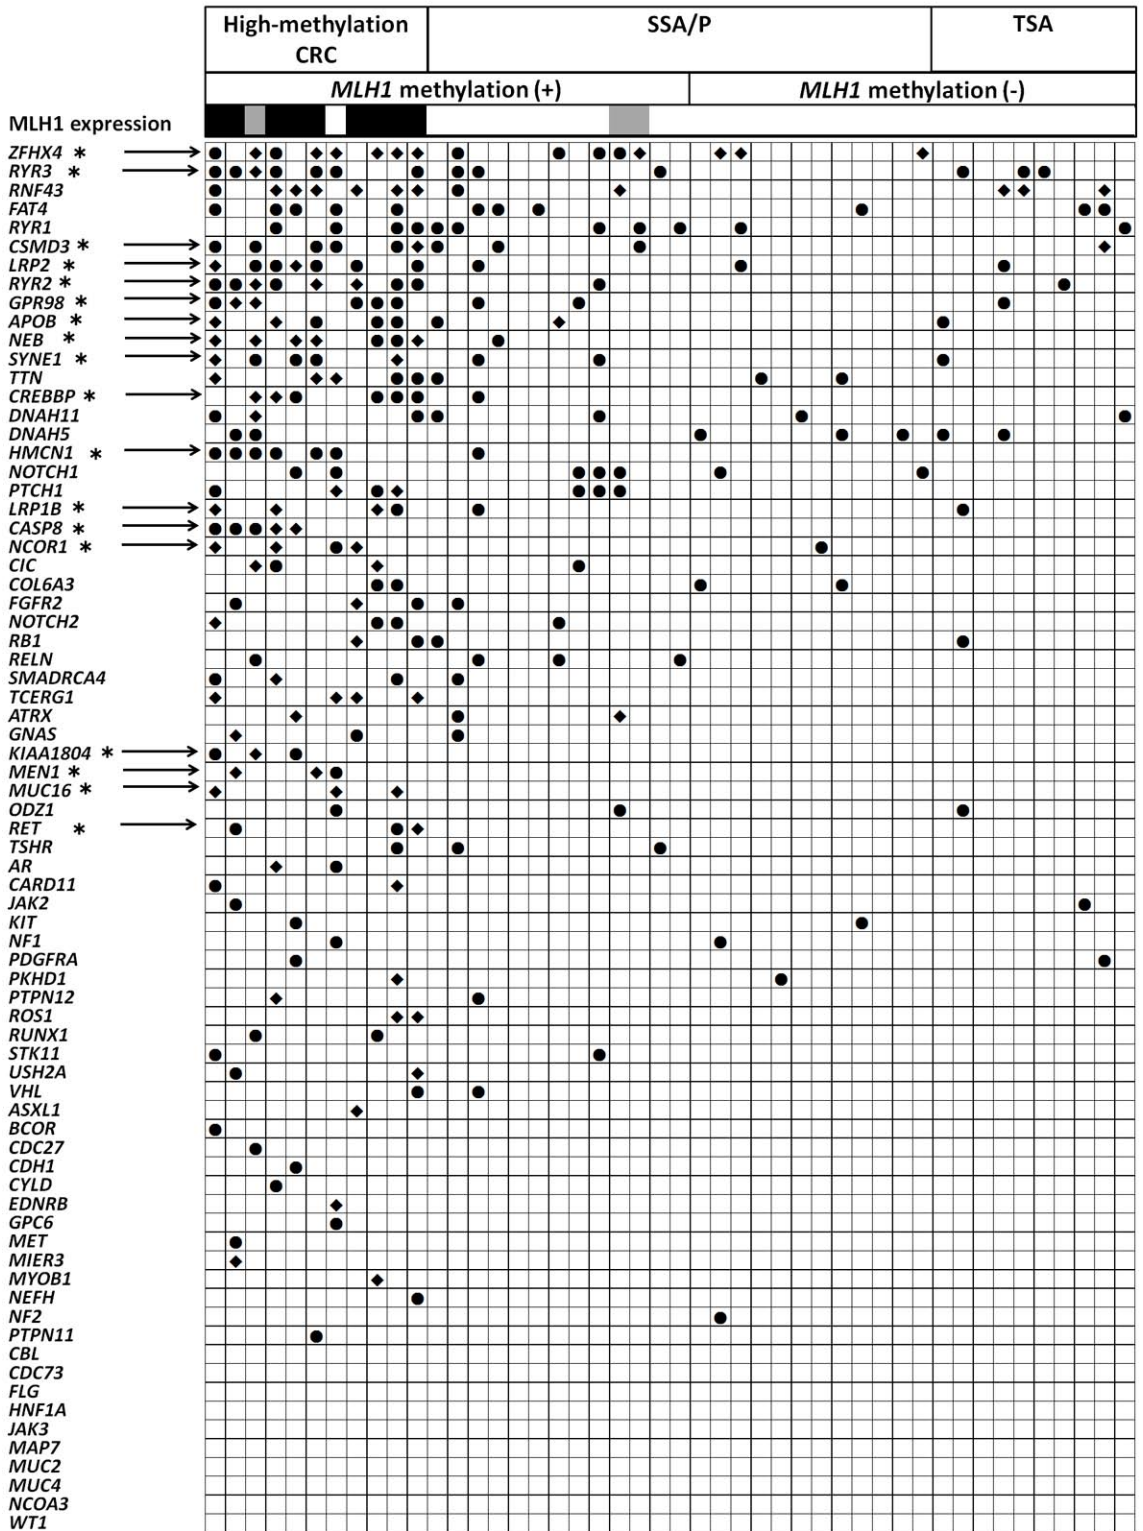

ACVR2A

Chromosome:2 Position:148683685 TA→T

A

SSA/P  
Mutation(-)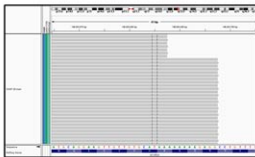High-methylation cancer  
Mutation(+)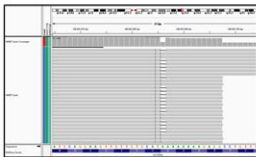

B

Normal mucosa  
TA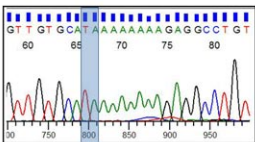Cancer  
T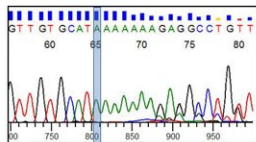

*MSH3* Chr5:79970914 CA→C

HME 9 normal CA

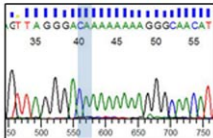

HME 9 cancer C

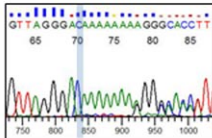*MSH6* Chr7:48030638 AC→A

HME 6 normal AC

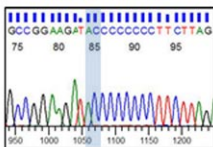

HME 6 cancer A

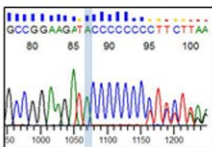*BMPR2* Chr2:203420129 GA→G

HME 7 control GA

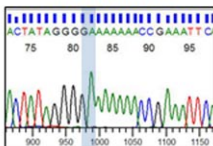

HME 7 cancer G

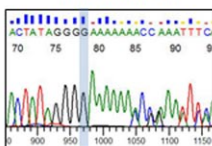

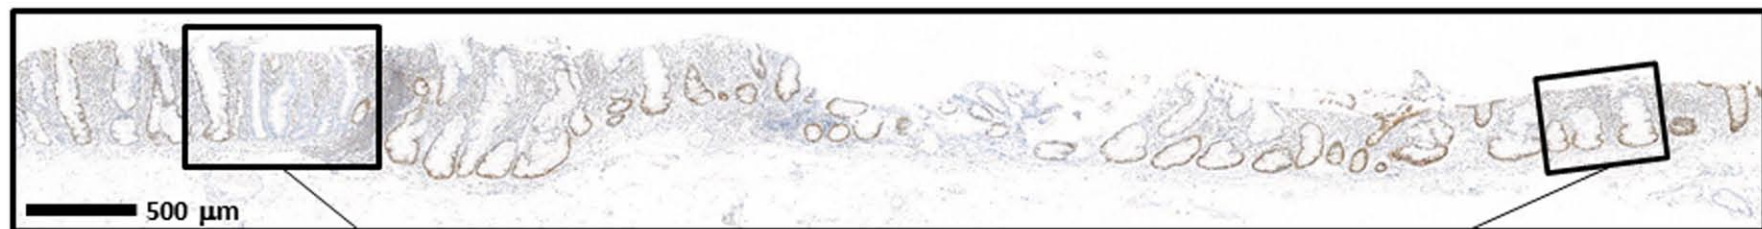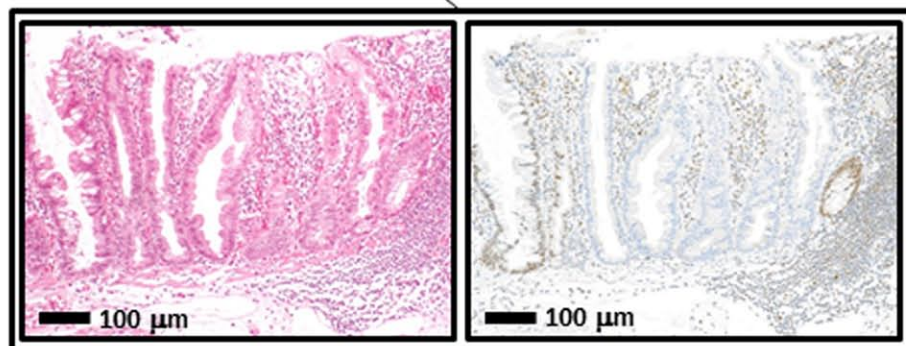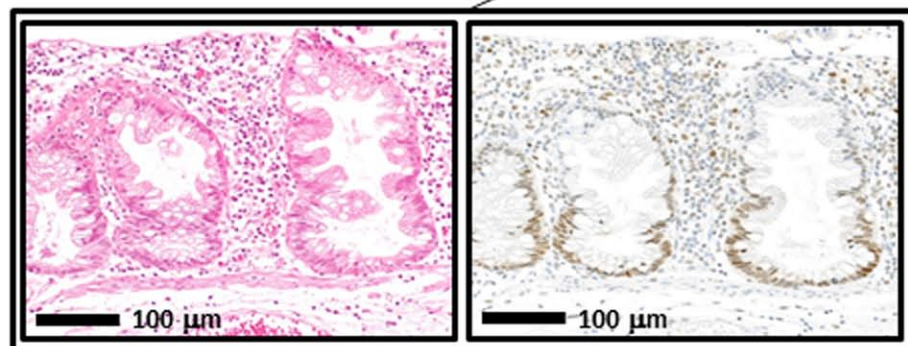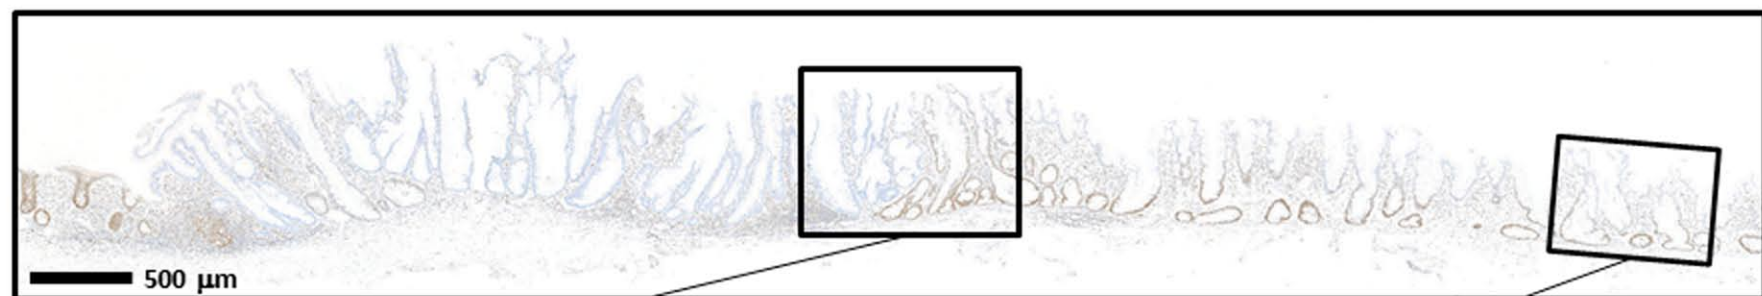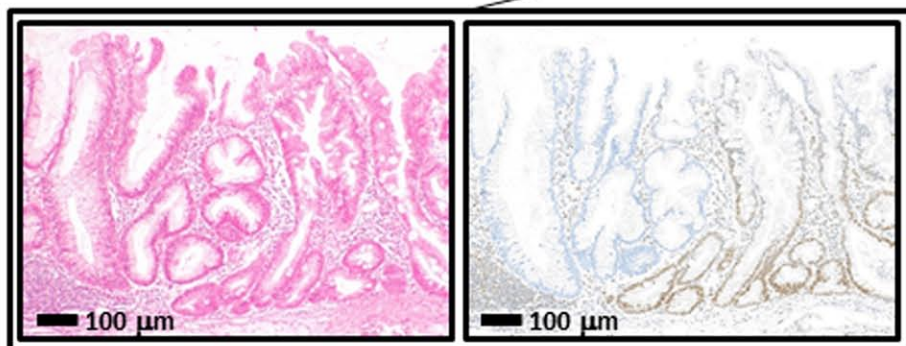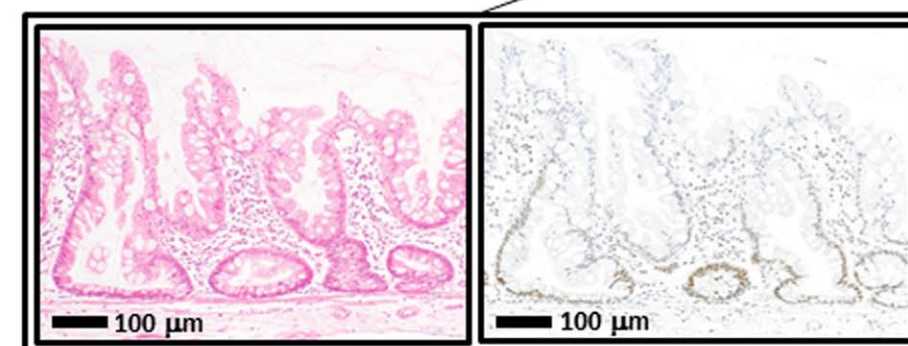

Supplement: IJC-138-1634-s001.pdf [file IJC-138-1634-s001.pdf]
